# Supplementary material for: Suppression of stress induction of the 78-kilodalton glucose regulated protein (GRP78) in cancer by IT-139, an anti-tumor ruthenium small molecule inhibitor
Source: PubMed Central journal article supplement (PMC6049868; doi:10.18632/oncotarget.25679), 2018-07-03
Supplement: oncotarget-09-29698-s001.pdf [file oncotarget-09-29698-s001.pdf]

## Suppression of stress induction of the 78-kilodalton glucose regulated protein (GRP78) in cancer by IT-139, an anti-tumor ruthenium small molecule inhibitor

### SUPPLEMENTARY MATERIALS

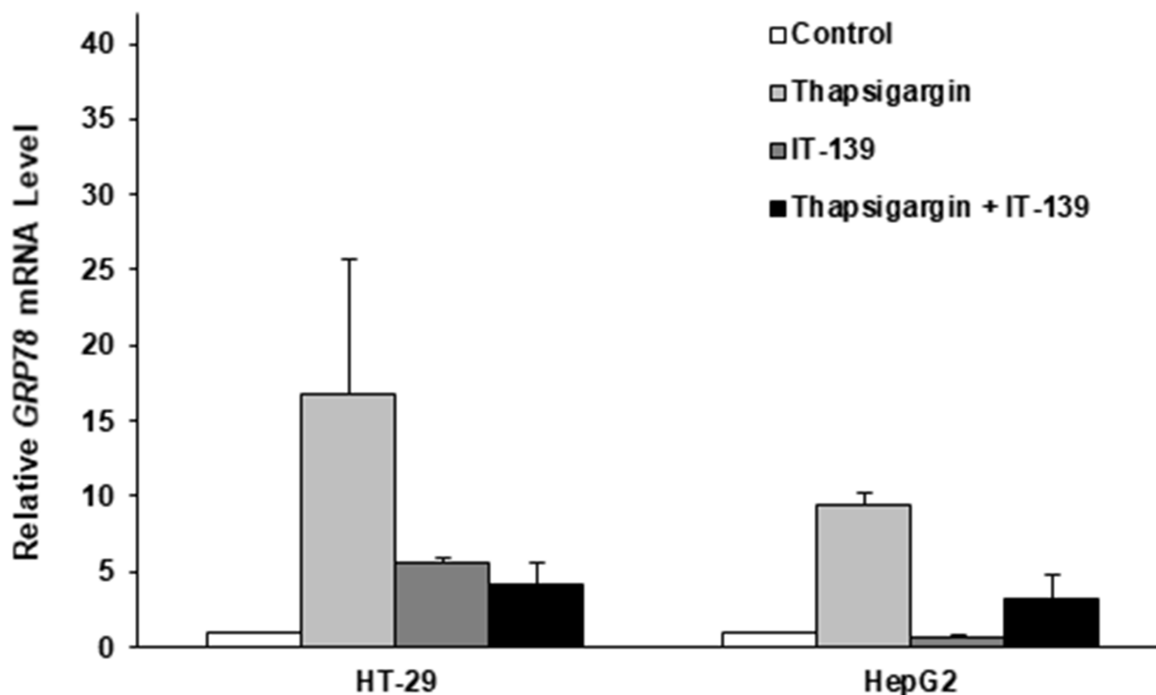

**Supplementary Figure 1: IT-139 suppresses *GRP78* expression at the transcriptional level.** The indicated cancer cell lines were treated as indicated and the *GRP78* mRNA levels were measured and plotted.

**A** SK-MEL-28 mRNA

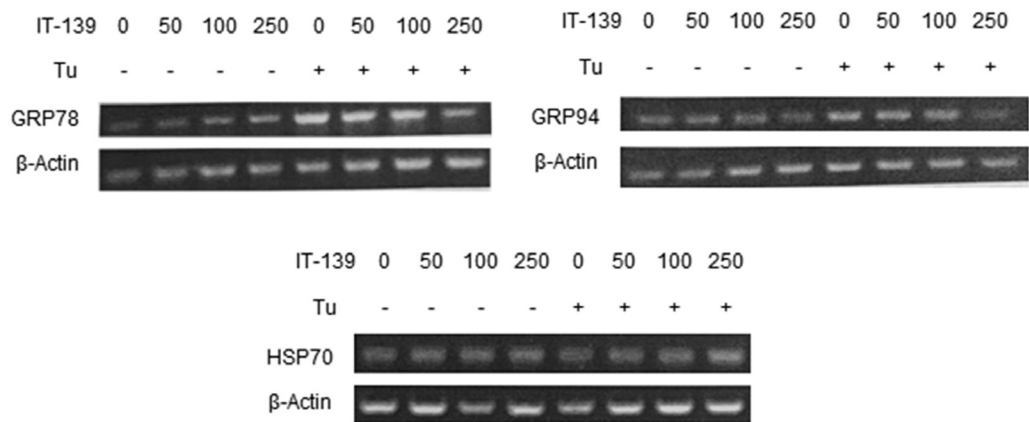

**B** SK-MEL-28 Protein

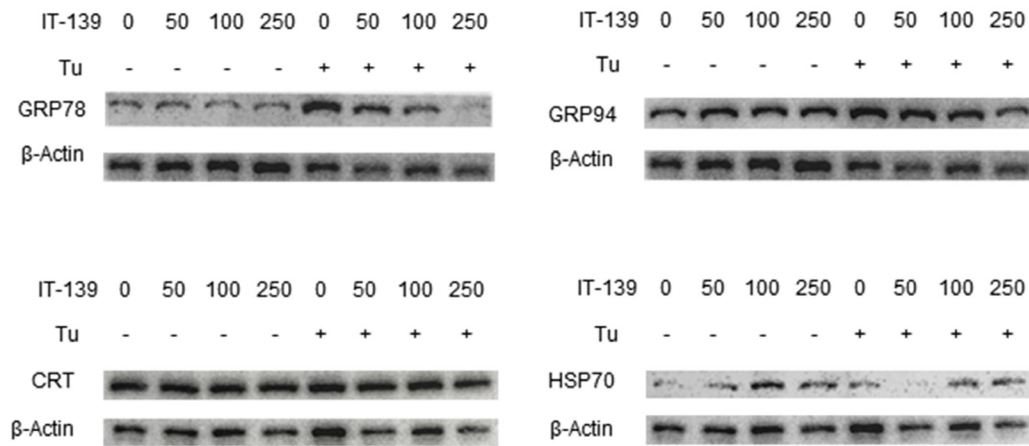

**Supplementary Figure 2: Effect of IT-139 on expression of chaperone protein family in SK-MEL-28 cells.** (A) Levels of GRP78, GRP94 and HSP70 mRNA in melanoma SK-MEL-28 cells treated with various dosages of IT-139. (B) same as (A) except the protein levels including CRT were shown.

**A**

A549 mRNA

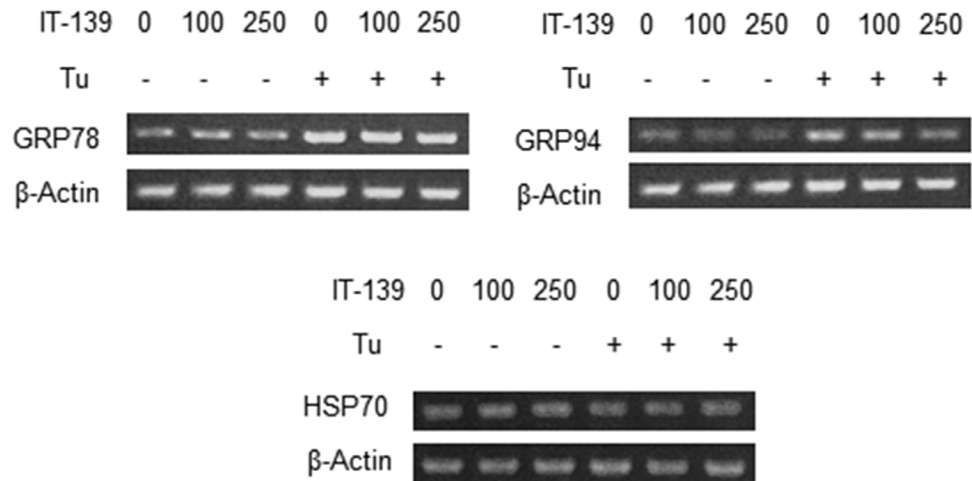**B**

A549 Protein

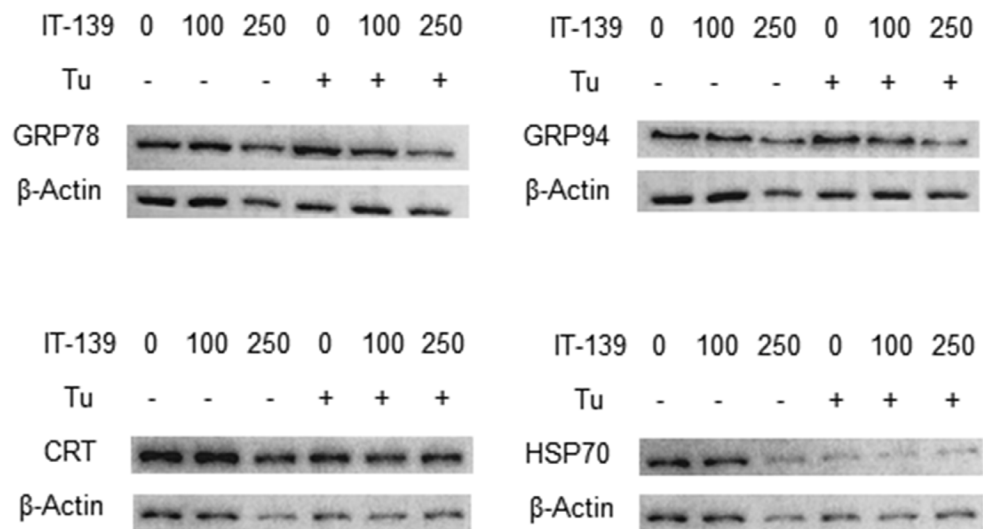

**Supplementary Figure 3. Effect of IT-139 on expression of chaperone protein family in A549 cells. (A)** Levels of GRP78, GRP94 and HSP70 mRNA in human lung cancer A549 cells treated with various dosages of IT-139. **(B)** same as (A) except the protein levels including CRT were shown.
